# Supplementary figures and images for: Preclinical development of novel PD-L1 tracers and first-in-human study of [68Ga]Ga-NOTA-RW102 in patients with lung cancers
Source: PubMed Central journal article supplement — J Immunother Cancer. 2024 Apr 5;12(4):e008794. doi: 10.1136/jitc-2024-008794 (PMC11002357; doi:10.1136/jitc-2024-008794), 2024-04-05

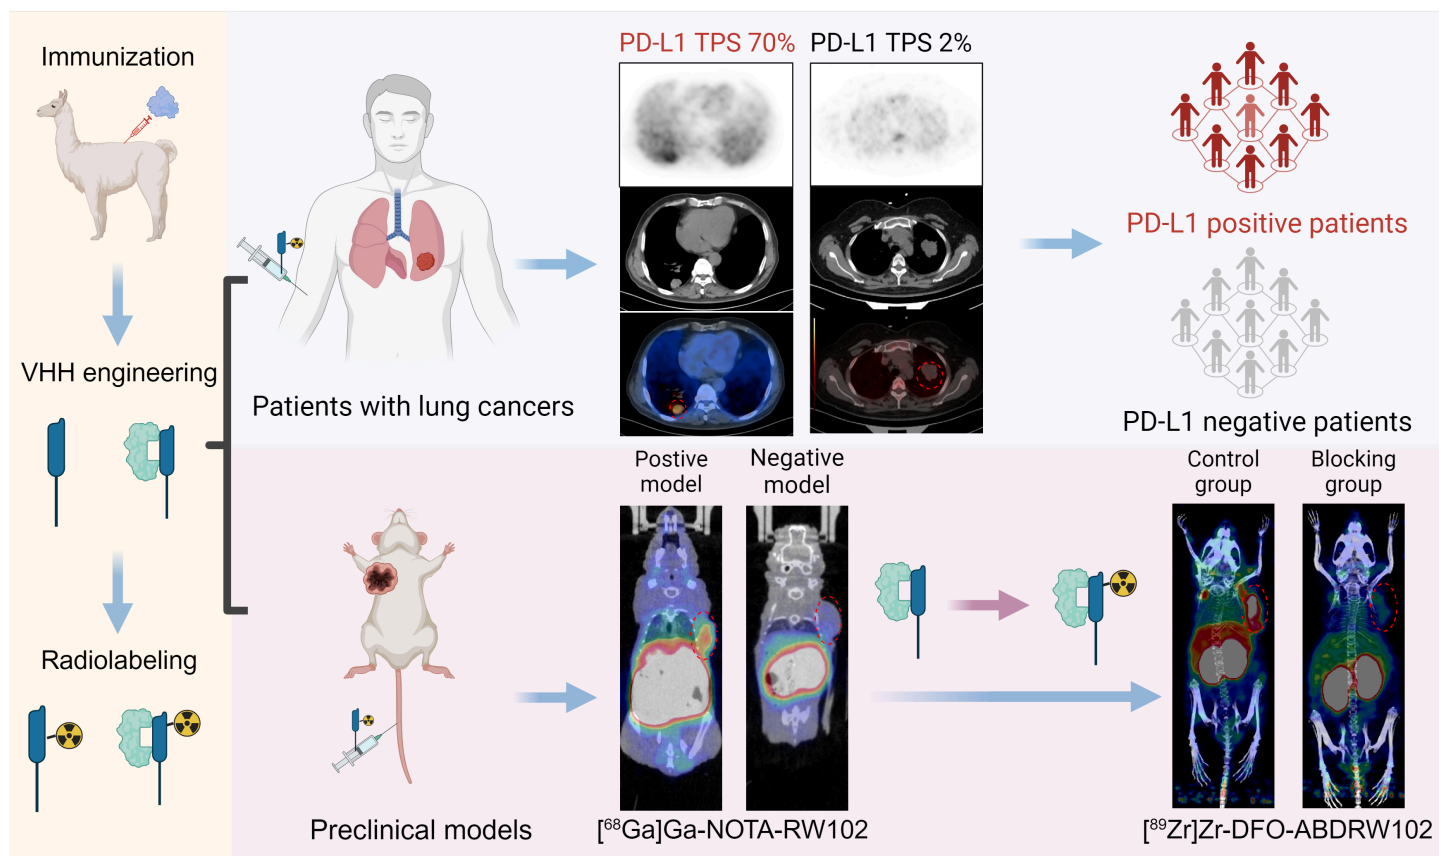

Supplement: jitc-2024-008794supp002.pdf [file jitc-2024-008794supp002.pdf]
